# Supplementary material
Source: PubMed Central journal article supplement (PMC1599977)
Supplement: pnas_0606348103_2.pdf [file pnas_0606348103_2.pdf]

**Table 3. Gene pairs duplicated before the divergence between *Saccharomyces cerevisiae* and *Saccharomyces bayanus* that have a small synonymous divergence ( $K_S$ ) between *S. cerevisiae* paralogues as identified by Gao and Innan (1).**

| Gene pairs                              | CAI values    |
|-----------------------------------------|---------------|
| With completely distorted tree topology |               |
| YHL033C / YLL045C                       | 0.842 / 0.849 |
| YGL135W / YPL220W                       | 0.832 / 0.821 |
| YBR031W / YDR012W                       | 0.803 / 0.812 |
| YBR009C / YNL030W                       | 0.734 / 0.627 |
| YHR203C / YJR145C                       | 0.709 / 0.695 |
| YMR186W / YPL240C                       | 0.581 / 0.518 |
| YDL131W / YDL182W                       | 0.329 / 0.321 |
| YDR312W / YHR066W                       | 0.160 / 0.189 |
| With partially distorted tree topology  |               |
| YBR181C / YPL090C                       | 0.846 / 0.837 |
| YEL034W / YJR047C                       | 0.814 / 0.704 |
| YBR189W / YPL081W                       | 0.810 / 0.507 |
| YCR031C / YJL191W                       | 0.805 / 0.590 |
| YHR141C / YNL162W                       | 0.795 / 0.769 |
| YLR029C / YMR121C                       | 0.783 / 0.436 |
| YFR031C-A / YIL018W                     | 0.773 / 0.764 |
| YGL147C / YNL067W                       | 0.771 / 0.778 |
| YDL083C / YMR143W                       | 0.764 / 0.677 |
| YDL136W / YDL191W                       | 0.759 / 0.798 |
| YGL031C / YGR148C                       | 0.759 / 0.756 |
| YBL072C / YER102W                       | 0.747 / 0.718 |
| YDL075W / YLR406C                       | 0.737 / 0.630 |
| YBR048W / YDR025W                       | 0.733 / 0.705 |
| YGR085C / YPR102C                       | 0.727 / 0.781 |
| YGR027C / YLR333C                       | 0.716 / 0.612 |
| YBL027W / YBR084C-A                     | 0.708 / 0.686 |
| YNL301C / YOL120C                       | 0.680 / 0.812 |
| YHL001W / YKL006W                       | 0.680 / 0.684 |
| YDL082W / YMR142C                       | 0.652 / 0.742 |
| YLR287C-A / YOR182C                     | 0.642 / 0.748 |
| YBL087C / YER117W                       | 0.624 / 0.648 |

|                             |               |
|-----------------------------|---------------|
| YBL002W / YDR224C           | 0.563 / 0.658 |
| With no topology distortion |               |
| YER074W / YIL069C           | 0.816 / 0.756 |
| YJL190C / YLR367W           | 0.812 / 0.523 |
| YMR230W / YOR293W           | 0.802 / 0.840 |
| YDR450W / YML026C           | 0.775 / 0.733 |
| YDR418W / YEL054C           | 0.766 / 0.605 |
| YER056C-A / YIL052C         | 0.763 / 0.781 |
| YDL061C / YLR388W           | 0.760 / 0.653 |
| YDR447C / YML024W           | 0.757 / 0.810 |
| YNL302C / YOL121C           | 0.757 / 0.794 |
| YOR234C / YPL143W           | 0.730 / 0.747 |
| YGR118W / YPR132W           | 0.726 / 0.789 |
| YER131W / YGL189C           | 0.711 / 0.781 |
| YDR500C / YLR185W           | 0.711 / 0.700 |
| YLR441C / YML063W           | 0.696 / 0.769 |
| YJL136C / YKR057W           | 0.693 / 0.596 |
| YBR191W / YPL079W           | 0.691 / 0.733 |
| YJL177W / YKL180W           | 0.680 / 0.809 |
| YGR034W / YLR344W           | 0.677 / 0.631 |
| YGR214W / YLR048W           | 0.668 / 0.733 |
| YMR242C / YOR312C           | 0.665 / 0.697 |
| YLR448W / YML073C           | 0.627 / 0.672 |
| YMR194W / YPL249C-A         | 0.620 / 0.800 |
| YIL133C / YNL069C           | 0.611 / 0.723 |
| YNL096C / YOR096W           | 0.597 / 0.747 |
| YJR094W-A / YPR043W         | 0.571 / 0.872 |
| YLR264W / YOR167C           | 0.561 / 0.528 |

1. Gao L-z, Innan H (2004) *Science* 306: 1367-1370.
