# Supplementary material
Source: PubMed Central journal article supplement (PMC1599977)
Supplement: pnas_0606348103_3.pdf [file pnas_0606348103_3.pdf]

**Table 4. The frequency of codon usage in highly expressed genes for the six species.**

| a.a. | Codon | <i>S. cerevisiae</i> | <i>S. paradoxus</i> | <i>S. mikatae</i> | <i>S. bayanus</i> | <i>K. waltii</i> | <i>A. gossypii</i> |
|------|-------|----------------------|---------------------|-------------------|-------------------|------------------|--------------------|
| Ala  | GCU   | <b>0.69</b>          | <b>0.67</b>         | <b>0.68</b>       | <b>0.62</b>       | <b>0.45</b>      | <b>0.35</b>        |
| Ala  | GCC   | <b>0.24</b>          | <b>0.25</b>         | <b>0.24</b>       | <b>0.31</b>       | <b>0.44</b>      | <b>0.39</b>        |
| Ala  | GCA   | 0.03                 | 0.03                | 0.03              | 0.02              | 0.03             | 0.05               |
| Ala  | GCG   | 0.00                 | 0.00                | 0.01              | 0.00              | 0.03             | 0.16               |
| Arg  | CGU   | 0.13                 | <b>0.15</b>         | 0.14              | <b>0.15</b>       | <b>0.18</b>      | <b>0.14</b>        |
| Arg  | CGC   | 0.00                 | 0.00                | 0.00              | 0.01              | 0.03             | 0.15               |
| Arg  | CGA   | 0.00                 | 0.00                | 0.00              | 0.00              | 0.00             | 0.00               |
| Arg  | CGG   | 0.00                 | 0.00                | 0.00              | 0.00              | 0.01             | 0.05               |
| Arg  | AGA   | <b>0.85</b>          | <b>0.82</b>         | <b>0.84</b>       | <b>0.84</b>       | <b>0.77</b>      | <b>0.63</b>        |
| Arg  | AGG   | 0.01                 | 0.02                | 0.02              | 0.01              | 0.02             | 0.03               |
| Asn  | AAU   | 0.13                 | 0.15                | 0.18              | 0.11              | 0.07             | 0.06               |
| Asn  | AAC   | <b>0.87</b>          | <b>0.85</b>         | <b>0.82</b>       | <b>0.89</b>       | <b>0.93</b>      | <b>0.94</b>        |
| Asp  | GAU   | 0.43                 | 0.45                | 0.46              | 0.39              | 0.16             | 0.14               |
| Asp  | GAC   | <b>0.57</b>          | <b>0.55</b>         | <b>0.54</b>       | <b>0.61</b>       | <b>0.84</b>      | <b>0.86</b>        |
| Cys  | UGU   | <b>0.89</b>          | <b>0.91</b>         | <b>0.92</b>       | <b>0.92</b>       | <b>0.61</b>      | <b>0.43</b>        |
| Cys  | UGC   | 0.11                 | 0.09                | 0.08              | 0.08              | 0.39             | 0.57               |
| Gln  | CAA   | <b>0.98</b>          | <b>0.97</b>         | <b>0.97</b>       | <b>0.99</b>       | 0.56             | 0.21               |
| Gln  | CAG   | 0.02                 | 0.03                | 0.03              | 0.01              | 0.44             | <b>0.79</b>        |
| Glu  | GAA   | <b>0.95</b>          | <b>0.95</b>         | <b>0.93</b>       | <b>0.96</b>       | 0.31             | 0.13               |
| Glu  | GAG   | 0.05                 | 0.05                | 0.07              | 0.04              | <b>0.69</b>      | <b>0.87</b>        |
| Gly  | GGU   | <b>0.93</b>          | <b>0.92</b>         | <b>0.93</b>       | <b>0.91</b>       | <b>0.80</b>      | <b>0.52</b>        |
| Gly  | GGC   | 0.05                 | 0.05                | 0.04              | 0.07              | 0.15             | 0.40               |
| Gly  | GGA   | 0.01                 | 0.02                | 0.02              | 0.01              | 0.04             | 0.02               |
| Gly  | GGG   | 0.00                 | 0.01                | 0.01              | 0.01              | 0.01             | 0.06               |
| His  | CAU   | 0.28                 | 0.30                | 0.33              | 0.27              | 0.09             | 0.08               |
| His  | CAC   | <b>0.72</b>          | <b>0.70</b>         | <b>0.67</b>       | <b>0.73</b>       | <b>0.91</b>      | <b>0.92</b>        |
| Ile  | AUU   | <b>0.48</b>          | <b>0.47</b>         | <b>0.49</b>       | 0.38              | 0.28             | 0.26               |
| Ile  | AUC   | <b>0.51</b>          | <b>0.51</b>         | <b>0.49</b>       | <b>0.60</b>       | <b>0.71</b>      | <b>0.71</b>        |
| Ile  | AUA   | 0.01                 | 0.02                | 0.02              | 0.02              | 0.01             | 0.02               |
| Leu  | UUA   | 0.16                 | 0.17                | 0.21              | 0.16              | 0.01             | 0.01               |
| Leu  | UUG   | <b>0.75</b>          | <b>0.71</b>         | <b>0.68</b>       | <b>0.73</b>       | <b>0.67</b>      | <b>0.57</b>        |
| Leu  | CUU   | 0.01                 | 0.03                | 0.02              | 0.02              | 0.06             | 0.05               |
| Leu  | CUC   | 0.00                 | 0.00                | 0.01              | 0.01              | 0.05             | 0.07               |
| Leu  | CUA   | 0.06                 | 0.06                | 0.07              | 0.07              | 0.12             | <b>0.15</b>        |

|     |     |             |             |             |             |             |             |
|-----|-----|-------------|-------------|-------------|-------------|-------------|-------------|
| Leu | CUG | 0.01        | 0.02        | 0.02        | 0.01        | 0.08        | 0.15        |
| Lys | AAA | 0.17        | 0.19        | 0.21        | 0.15        | 0.09        | 0.04        |
| Lys | AAG | <b>0.83</b> | <b>0.81</b> | <b>0.79</b> | <b>0.85</b> | <b>0.91</b> | <b>0.96</b> |
| Met | AUG | 1.00        | 1.00        | 1.00        | 1.00        | 1.00        | 1.00        |
| Phe | UUU | 0.21        | 0.23        | 0.25        | 0.16        | 0.15        | 0.15        |
| Phe | UUC | <b>0.79</b> | <b>0.77</b> | <b>0.75</b> | <b>0.84</b> | <b>0.85</b> | <b>0.85</b> |
| Pro | CCU | 0.12        | 0.14        | 0.15        | 0.13        | 0.27        | 0.18        |
| Pro | CCC | 0.00        | 0.01        | 0.01        | 0.02        | 0.04        | 0.10        |
| Pro | CCA | <b>0.88</b> | <b>0.85</b> | <b>0.84</b> | <b>0.85</b> | <b>0.67</b> | <b>0.61</b> |
| Pro | CCG | 0.00        | 0.01        | 0.00        | 0.00        | 0.01        | 0.10        |
| Ser | UCU | <b>0.53</b> | <b>0.53</b> | <b>0.57</b> | <b>0.49</b> | <b>0.42</b> | <b>0.29</b> |
| Ser | UCC | <b>0.36</b> | <b>0.35</b> | <b>0.32</b> | <b>0.41</b> | <b>0.41</b> | <b>0.44</b> |
| Ser | UCA | 0.04        | 0.04        | 0.04        | 0.04        | 0.03        | 0.03        |
| Ser | UCG | 0.01        | 0.01        | 0.01        | 0.00        | 0.06        | 0.17        |
| Ser | AGU | 0.03        | 0.03        | 0.03        | 0.03        | 0.02        | 0.01        |
| Ser | AGC | 0.03        | 0.03        | 0.03        | 0.03        | 0.06        | 0.05        |
| Thr | ACU | <b>0.52</b> | <b>0.51</b> | <b>0.53</b> | <b>0.42</b> | <b>0.34</b> | 0.22        |
| Thr | ACC | <b>0.44</b> | <b>0.44</b> | <b>0.42</b> | <b>0.55</b> | <b>0.59</b> | <b>0.59</b> |
| Thr | ACA | 0.03        | 0.04        | 0.04        | 0.03        | 0.04        | 0.04        |
| Thr | ACG | 0.00        | 0.01        | 0.01        | 0.00        | 0.03        | 0.15        |
| Trp | UGG | 1.00        | 1.00        | 1.00        | 1.00        | 1.00        | 1.00        |
| Tyr | UAU | 0.15        | 0.16        | 0.18        | 0.09        | 0.07        | 0.07        |
| Tyr | UAC | <b>0.85</b> | <b>0.84</b> | <b>0.82</b> | <b>0.91</b> | <b>0.93</b> | <b>0.93</b> |
| Val | GUU | <b>0.56</b> | <b>0.55</b> | <b>0.56</b> | <b>0.45</b> | 0.33        | <b>0.23</b> |
| Val | GUC | <b>0.41</b> | <b>0.41</b> | <b>0.40</b> | <b>0.51</b> | <b>0.50</b> | <b>0.46</b> |
| Val | GUA | 0.01        | 0.01        | 0.02        | 0.01        | 0.01        | 0.01        |
| Val | GUG | 0.03        | 0.03        | 0.02        | 0.02        | 0.15        | 0.29        |

Favored codons comparing with less expressed genes (Table 5) are represented as bold ( $P < 0.05$ ). a.a., amino acid; S, *Saccharomyces*; K, *Kluyveromyces*; A, *Ashbya*.
