# Supplementary material
Source: PubMed Central journal article supplement (PMC1599977)
Supplement: pnas_0606348103_4.pdf [file pnas_0606348103_4.pdf]

**Table 5. The frequency of codon usage in the less expressed genes for the six species.**

| a.a. | Codon | <i>S. cerevisiae</i> | <i>S. paradoxus</i> | <i>S. mikatae</i> | <i>S. bayanus</i> | <i>K. waltii</i> | <i>A. gossypii</i> |
|------|-------|----------------------|---------------------|-------------------|-------------------|------------------|--------------------|
| Ala  | GCU   | 0.32                 | 0.32                | 0.33              | 0.29              | 0.31             | 0.18               |
| Ala  | GCC   | 0.20                 | 0.21                | 0.20              | 0.25              | 0.22             | 0.24               |
| Ala  | GCA   | 0.32                 | 0.31                | 0.31              | 0.29              | 0.28             | 0.22               |
| Ala  | GCG   | 0.13                 | 0.13                | 0.12              | 0.14              | 0.16             | 0.34               |
| Arg  | CGU   | 0.13                 | 0.12                | 0.13              | 0.12              | 0.15             | 0.12               |
| Arg  | CGC   | 0.06                 | 0.06                | 0.06              | 0.07              | 0.15             | 0.28               |
| Arg  | CGA   | 0.08                 | 0.08                | 0.08              | 0.07              | 0.11             | 0.07               |
| Arg  | CGG   | 0.04                 | 0.04                | 0.04              | 0.05              | 0.10             | 0.24               |
| Arg  | AGA   | 0.46                 | 0.45                | 0.47              | 0.46              | 0.30             | 0.14               |
| Arg  | AGG   | 0.24                 | 0.24                | 0.23              | 0.23              | 0.17             | 0.15               |
| Asn  | AAU   | 0.62                 | 0.61                | 0.62              | 0.55              | 0.51             | 0.41               |
| Asn  | AAC   | 0.38                 | 0.39                | 0.38              | 0.45              | 0.49             | 0.59               |
| Asp  | GAU   | 0.67                 | 0.66                | 0.68              | 0.61              | 0.55             | 0.44               |
| Asp  | GAC   | 0.33                 | 0.34                | 0.32              | 0.39              | 0.45             | 0.56               |
| Cys  | UGU   | 0.61                 | 0.60                | 0.63              | 0.58              | 0.48             | 0.35               |
| Cys  | UGC   | 0.39                 | 0.40                | 0.37              | 0.42              | 0.52             | 0.65               |
| Gln  | CAA   | 0.67                 | 0.66                | 0.66              | 0.65              | 0.54             | 0.30               |
| Gln  | CAG   | 0.33                 | 0.34                | 0.34              | 0.35              | 0.46             | 0.70               |
| Glu  | GAA   | 0.69                 | 0.68                | 0.68              | 0.67              | 0.54             | 0.38               |
| Glu  | GAG   | 0.31                 | 0.32                | 0.32              | 0.33              | 0.46             | 0.62               |
| Gly  | GGU   | 0.39                 | 0.39                | 0.41              | 0.38              | 0.31             | 0.20               |
| Gly  | GGC   | 0.21                 | 0.22                | 0.20              | 0.24              | 0.28             | 0.40               |
| Gly  | GGA   | 0.26                 | 0.25                | 0.25              | 0.21              | 0.25             | 0.16               |
| Gly  | GGG   | 0.14                 | 0.15                | 0.14              | 0.17              | 0.16             | 0.25               |
| His  | CAU   | 0.66                 | 0.65                | 0.67              | 0.62              | 0.54             | 0.44               |
| His  | CAC   | 0.34                 | 0.35                | 0.33              | 0.38              | 0.46             | 0.56               |
| Ile  | AUU   | 0.45                 | 0.44                | 0.44              | 0.40              | 0.41             | 0.34               |
| Ile  | AUC   | 0.24                 | 0.25                | 0.24              | 0.30              | 0.34             | 0.41               |
| Ile  | AUA   | 0.31                 | 0.31                | 0.31              | 0.30              | 0.25             | 0.25               |
| Leu  | UUA   | 0.28                 | 0.27                | 0.28              | 0.24              | 0.13             | 0.09               |
| Leu  | UUG   | 0.26                 | 0.27                | 0.27              | 0.28              | 0.21             | 0.18               |
| Leu  | CUU   | 0.13                 | 0.13                | 0.13              | 0.12              | 0.19             | 0.13               |
| Leu  | CUC   | 0.06                 | 0.06                | 0.06              | 0.07              | 0.15             | 0.16               |
| Leu  | CUA   | 0.15                 | 0.14                | 0.14              | 0.15              | 0.14             | 0.13               |

|     |     |      |      |      |      |      |      |
|-----|-----|------|------|------|------|------|------|
| Leu | CUG | 0.12 | 0.12 | 0.12 | 0.15 | 0.18 | 0.32 |
| Lys | AAA | 0.60 | 0.59 | 0.60 | 0.56 | 0.50 | 0.33 |
| Lys | AAG | 0.40 | 0.41 | 0.40 | 0.44 | 0.50 | 0.67 |
| Met | AUG | 1.00 | 1.00 | 1.00 | 1.00 | 1.00 | 1.00 |
| Phe | UUU | 0.61 | 0.60 | 0.61 | 0.54 | 0.51 | 0.44 |
| Phe | UUC | 0.39 | 0.40 | 0.39 | 0.46 | 0.49 | 0.56 |
| Pro | CCU | 0.32 | 0.31 | 0.32 | 0.28 | 0.33 | 0.20 |
| Pro | CCC | 0.17 | 0.18 | 0.17 | 0.21 | 0.20 | 0.22 |
| Pro | CCA | 0.38 | 0.37 | 0.38 | 0.36 | 0.32 | 0.24 |
| Pro | CCG | 0.14 | 0.15 | 0.13 | 0.15 | 0.15 | 0.33 |
| Ser | UCU | 0.24 | 0.24 | 0.24 | 0.22 | 0.22 | 0.16 |
| Ser | UCC | 0.14 | 0.15 | 0.14 | 0.17 | 0.15 | 0.17 |
| Ser | UCA | 0.22 | 0.22 | 0.22 | 0.20 | 0.18 | 0.12 |
| Ser | UCG | 0.10 | 0.11 | 0.10 | 0.12 | 0.14 | 0.21 |
| Ser | AGU | 0.17 | 0.17 | 0.18 | 0.16 | 0.15 | 0.11 |
| Ser | AGC | 0.12 | 0.12 | 0.11 | 0.12 | 0.17 | 0.22 |
| Thr | ACU | 0.32 | 0.32 | 0.33 | 0.29 | 0.30 | 0.20 |
| Thr | ACC | 0.19 | 0.20 | 0.19 | 0.23 | 0.23 | 0.25 |
| Thr | ACA | 0.33 | 0.32 | 0.33 | 0.30 | 0.28 | 0.24 |
| Thr | ACG | 0.16 | 0.16 | 0.15 | 0.17 | 0.19 | 0.31 |
| Trp | UGG | 1.00 | 1.00 | 1.00 | 1.00 | 1.00 | 1.00 |
| Tyr | UAU | 0.59 | 0.59 | 0.60 | 0.54 | 0.45 | 0.37 |
| Tyr | UAC | 0.41 | 0.41 | 0.40 | 0.46 | 0.55 | 0.63 |
| Val | GUU | 0.37 | 0.36 | 0.36 | 0.32 | 0.31 | 0.21 |
| Val | GUC | 0.18 | 0.19 | 0.18 | 0.22 | 0.22 | 0.23 |
| Val | GUA | 0.24 | 0.24 | 0.25 | 0.21 | 0.20 | 0.14 |
| Val | GUG | 0.21 | 0.22 | 0.22 | 0.25 | 0.27 | 0.41 |

a.a., amino acid; S, *Saccharomyces*; K, *Kluyveromyces*; A, *Ashbya*.
