# Supplementary material
Source: PubMed Central journal article supplement (PMC1599977)

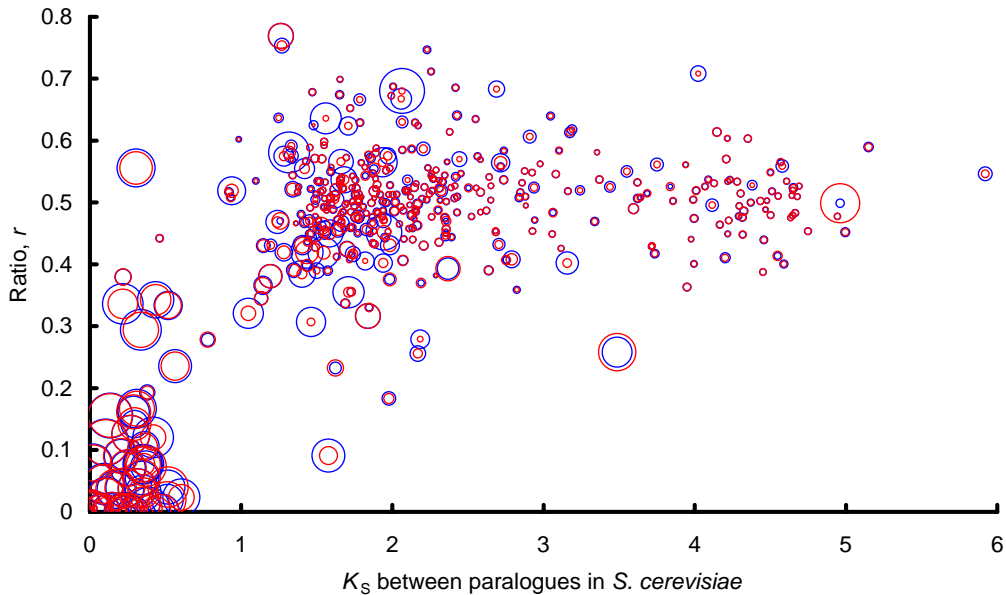

Supplement: pnas_0606348103_1.pdf [file pnas_0606348103_1.pdf]
